# 1 ***Magnetospirillum magneticum* as a living iron chelator**

## 2 **induces transferrin receptor 1 upregulation in cancer cells**

3  
4 Stefano Menghini<sup>†</sup>, Ping Shu Ho<sup>†</sup>, Tinotenda Gwisai, Simone Schuerle\*

5  
6 Institute for Translational Medicine, Department of Health Sciences and Technology,  
7 ETH Zurich, CH-8092 Zurich, Switzerland.

### 8 9 10 **Abstract**

11  
12 Iron chelating agents derived from bacterial siderophores were originally used for iron overload  
13 syndromes but have recently been investigated for cancer therapy. While systemic administration of  
14 iron chelating agents induces undesirable side effects, bacteria as a source of siderophores could  
15 potentially act as local chelator that is tumor-targeted and amplifies its impact through preferential  
16 accumulation and self-replication in tumors. Here, we report the use and characterization of  
17 *Magnetospirillum magneticum* AMB-1 as living iron chelator. We quantified the amount of secreted  
18 bacterial siderophores and show that they exert changes in human transferrin's (Tf) structure. Next, we  
19 examined the bacteria's ability to target iron homeostasis *in vitro* and our experiments revealed an  
20 increased expression of transferrin receptor 1 (TfR1). Our results suggest that magnetotactic bacteria  
21 have potential as self-replicating antineoplastic agents which compete with cancer cells for iron, and  
22 might be a solution for overcoming challenges of current iron chelation cancer therapies.

23  
24  
25  
26  
27  
28  
29  
30  
31  
32  
33  
34  
35  
36  
37  
38 † These authors contributed equally

39 \* Corresponding author: [simone.schuerle@hest.ethz.ch](mailto:simone.schuerle@hest.ethz.ch)

## 40 **Introduction**

41  
42 Iron is an essential nutrient required for numerous mammalian cell functions, and plays a crucial role in  
43 cancer development and progression.<sup>1, 2</sup> Iron metabolism is significantly altered in mammalian tumor  
44 cells and, as such, is a metabolic hallmark of cancer.<sup>3, 4</sup> The main iron uptake mechanism adopted by  
45 most cells utilizes the internalization of transferrin receptor 1 (TfR1) upon binding of iron-bound  
46 transferrin (Tf). TfR1 expression positively correlates with cellular iron starvation and is upregulated in  
47 cancer cells, since malignant cells generally require an iron surplus, especially for proliferation and  
48 spread.<sup>4-6</sup>

49  
50 Bacteria and other microorganisms secrete siderophores, natural iron chelators that display a greater  
51 affinity for iron than proteins secreted by eukaryotic cells, such as transferrin. These highly selective  
52 and potent microbial iron chelators are released in a pathogenic context, allowing bacteria to out-  
53 compete the host cells for ferric iron.<sup>7, 8</sup> Deferoxamine (DFO), a siderophore isolated from *Streptomyces*  
54 *pilosus*, is a natural iron chelator used to treat syndromes characterized by excess iron in the body such  
55 as hemochromatosis.<sup>9, 10</sup> Synthetic iron-chelators with enhanced pharmacologic and pharmacokinetic  
56 properties have also been developed.<sup>11</sup> Deferasirox is an FDA approved synthetic oral chelator used in  
57 the treatment of transfusion iron overload conditions. Recently, it was found to induce a significant  
58 decrease in tumor cell viability in both *in vitro* and *in vivo* studies.<sup>12-14</sup> Both natural and synthetic iron-  
59 chelators have been utilized to compete with malignant cells for available iron sources and several have  
60 demonstrated significant anti-neoplastic activity. However, non-negligible side effects, systemic toxicity,  
61 and low efficacy have hampered their translation into clinical trials as therapeutic agents for cancer  
62 treatment.<sup>15-17</sup>

63  
64 Gram-negative magnetotactic bacteria (MTB) secrete high-affinity siderophores and use the acquired  
65 iron for both survival and synthesis of magnetite.<sup>18, 19</sup> The biomineralized magnetite nanocrystals are  
66 arranged in chains enclosed in a lipid bilayer and these intracellular organelles, called magnetosomes,  
67 enable them to align along magnetic fields.<sup>20-22</sup> Furthermore, MTB are aerotactic, possessing an  
68 oxygen-sensing system that regulates motility in an oxygen gradient.<sup>23, 24</sup> Aerotaxis and hypoxic traits  
69 have been leveraged in *Salmonella* strains, enabling them to act as bacterial anti-cancer agents that  
70 target necrotic tumor microenvironments with poor oxygen supply.<sup>25, 26</sup> In addition to enhanced tumor  
71 accumulation, native bacterial cytotoxicity, expression of anticancer agents, and localized gene-  
72 triggering systems have been exploited for their use in clinical cancer therapy.<sup>27-30</sup>

73  
74 Here, we report the potential of localized iron deprivation as another weapon in bacterial cancer therapy  
75 by employing *Magnetospirillum magneticum* AMB-1. Like other magnetotactic bacteria, AMB-1  
76 endogenously biomineralizes magnetosomes through the uptake of iron from their environment.<sup>22, 31</sup>  
77 We investigated the effect of AMB-1 produced siderophores on human transferrin structure and, thus,  
78 their potential as iron chelation agents. Additionally, we studied the influence of AMB-1 siderophores  
79 on cell surface TfR1 expression using human melanoma cancer cells. Exploiting the iron scavenging

80 properties of magnetotactic bacteria in combination with their ability to be used as bacterial anti-cancer  
81 agents may enable AMB-1 to be implemented for anti-neoplastic purposes.

82  
83

## 84 **Results**

85

### 86 **AMB-1 produced siderophores affect human transferrin structure in mammalian cell culture** 87 **medium**

88

89 First, we sought to determine whether AMB-1 would produce siderophores in Dulbecco's Modified  
90 Eagle's medium (DMEM). Using the Chrome Azurol S (CAS) assay (Supplementary Fig. 1),  $10^8$  AMB-  
91 1 cells were found to produce  $0.10 \pm 0.005$  siderophore units in DMEM supplemented with  $25 \mu\text{M}$  holo-  
92 transferrin (holo-Tf), while siderophore production in transferrin-free DMEM was negligible (Fig. 1A).  
93 AMB-1 siderophore production was compared to the widely used iron chelator deferoxamine. It was  
94 found that the siderophores produced by  $10^8$  AMB-1 in Tf-supplemented media was equivalent to  $3.78$   
95  $\mu\text{M} \pm 0.117 \mu\text{M}$  deferoxamine (Fig. 1B).

96

97 Having established the ability of AMB-1 to produce siderophores in Tf-supplemented media, we next  
98 determined whether AMB-1 would have an effect on human transferrin structure. SDS-PAGE analysis  
99 was used to compare DMEM supplemented with either iron-containing holo-Tf or iron-depleted apo-Tf.  
100 The apo-Tf appeared as a broader band on the SDS-gel compared to holo-Tf (Fig. 1C). Furthermore,  
101 we ascertained that holo-Tf structure was not affected by a 48 h incubation period at  $30^\circ\text{C}$ . To test  
102 whether the bacteria induced changes in Tf, AMB-1 were inoculated in DMEM supplemented with holo-  
103 Tf. This approach revealed that holo-Tf formed a broader band very similar to that seen for the apo-Tf  
104 band incubated in DMEM (Fig. 1C, lane 6). These experiments demonstrate that AMB-1 produced a  
105 quantifiable amount of siderophore when holo-Tf was supplemented to the mammalian cell culture  
106 media and that the structure of holo-Tf was altered by the bacteria.

107

### 108 **AMB-1 upregulates TfR1 expression in human melanoma cells**

109

110 To determine whether AMB-1 can affect the iron uptake machinery in mammalian tumor cells we co-  
111 cultured AMB-1 with the human melanoma cell line MDA-MB-435S and monitored TfR1 expression  
112 using immunofluorescence. The surface expression of TfR1 increased 2.7-fold on cancer cells co-  
113 cultured with live bacteria at AMB-1:MDA-MB-435S ratios as low as 10:1 ( $10^6$  AMB-1). The TfR1  
114 upregulation was shown to increase with increasing bacteria ratios (Fig. 2A, B). Deferoxamine was  
115 used here to create iron-deficient cell culture conditions as a positive control. MDA-MB-435S cells  
116 showed a significant and increasing upregulation of TfR1 surface expression up to 5.6-fold. To ensure  
117 that the upregulation of TfR1 expression was on the cell surface and not cytoplasmic, cell membrane  
118 integrity in the cultures was monitored. Less than 5% of cells were stained by the cell-impermeant DNA  
119 stain propidium iodide (PI), indicating cell membrane preservation over time (Fig. 2C).

120

121 To gain insights on the TfR1 expression kinetics of the cell population, AMB-1-induced increase of cell  
122 surface TfR1 expression was analyzed over time. The effect, at an AMB-1:MDA-MB-435S ratio of  
123 1000:1 was already apparent after 6 h of co-culture (Fig. 1D). The fluorescent intensity after 24 h of co-  
124 culture was 1.8 times higher than the initial value, while the change reached 95% of the final value after  
125 12 h (Fig. 1E). Untreated cancer cells did not display any increase in fluorescence (Fig. 1F). Altogether,  
126 these findings show an upregulation of TfR1 on the cell surface of human melanoma cancer cells in  
127 presence of AMB-1, thereby suggesting a direct link between AMB-1 induced disruption of iron uptake  
128 and TfR1 expression.

129

130

### 131 **Discussion**

132

133 Magnetotactic bacteria acquire iron through siderophore-mediated uptake, as ferric and ferrous ions  
134 cannot enter bacteria cells directly. We quantified the amount of siderophores produced by strain  
135 *Magnetospirillum magneticum* AMB-1 and investigated the bacteria's effect on human transferrin's  
136 structure in mammalian cell culture medium. The addition of AMB-1 to the media led to a broader holo-  
137 Tf band, similar to the one of apo-Tf in DMEM, suggesting that the bacteria induced changes in Tf's  
138 molecular mass and structure (Fig. 1C, lane 6). Comparing our findings to studies involving the  
139 proteolytic cleavage of transferrin by *Prevotella nigrescens* we can deduce that specific cleavage of the  
140 protein did not occur, as sub-products with lower molecular mass were not detected on the gel.<sup>32</sup>  
141 Therefore, our results suggest a loss of iron ions by holo-Tf, which is consistent with bacteria-produced  
142 siderophores having a higher affinity for Fe ions compared to human transferrin.<sup>7, 8</sup> This higher affinity  
143 could be exploited by AMB-1 to efficiently compete for ferric ions with the host cells, resulting in iron  
144 starvation for the latter.

145

146 We then showed that AMB-1 inoculation with mammalian cancer cell cultures did affect iron  
147 homeostasis of the cancer cells. Increased TfR1 surface expression found on MDA-MB-435S  
148 melanoma cancer cells correlates with increasing bacteria ratios. This finding suggests that AMB-1  
149 effectively competes for free iron ions and therefore limits the mineral's availability to MDA-MB-435S  
150 cells (Fig. 2A, B). Moreover, a significant increase of TfR1 expression could already be detected 6 h  
151 after inoculation (Fig. 2D-F). Similarly, the cancer cells showed a significant upregulation of TfR1  
152 surface expression after incubation with deferoxamine (10  $\mu$ M and 25  $\mu$ M), in line with previous reports  
153 on cellular iron deficiency.<sup>4, 5, 33</sup> These observations demonstrated that AMB-1 affect the iron import  
154 mechanisms of human melanoma cells, acting as an effective competitor for iron when in co-culture  
155 with MDA-MB-435S cells.

156

157 Our data supports the idea that AMB-1 have the ability to act as living iron chelators by secreting a  
158 considerable amount of siderophores that was quantified. We showed that  $10^8$  AMB-1 are able to  
159 produce high-affinity iron scavenging molecules equivalent to 3.78  $\mu$ M deferoxamine over 24 h (Fig.

160 1B). Previous studies demonstrated that the treatment of different cell lines with 10  $\mu\text{M}$  - 30  $\mu\text{M}$   
161 deferoxamine significantly reduced cell viability *in vitro*.<sup>13, 33</sup> Moreover, significant diminution of cell  
162 viability was even detected at the lower deferoxamine concentration of 2.5  $\mu\text{M}$  when combined with the  
163 chemotherapeutic drug cisplatin.<sup>13</sup> The ability of AMB-1 to self-replicate and secrete comparable,  
164 sustained doses of siderophores qualifies them as promising candidates for further studies.

165

166 The investigation of nutrient deprivation as a potential anti-cancer therapy is still in its infancy. Our work  
167 motivates the use of living AMB-1 as self-replicating iron chelators actively competing for this vital  
168 mineral, with the possibility of compromising the survival of cancer cells. This approach lays the  
169 foundation for future investigations which combine iron chelation with bacterial cancer therapy to  
170 enhance existing therapeutic strategies and open new frontiers for combating cancer.

171

172

## 173 **Materials and Methods**

174

### 175 **Bacterial strain and culture condition**

176

177 *Magnetospirillum magneticum* AMB-1, a strain of magnetotactic bacteria, was purchased from ATCC  
178 (ATCC, Manassas, Virginia, USA). AMB-1 bacteria were grown anaerobically at 30°C, passaged weekly  
179 and cultured in liquid growth medium (ATCC medium: 1653 Revised Magnetic Spirillum Growth  
180 Medium). *Magnetospirillum magneticum* Growth Media (MSGM) contained the following per liter: 5.0  
181 mL Wolfe's mineral solution (ATCC, Manassas, Virginia, USA), 0.45 mL Resazurin, 0.68 g of  
182 monopotassium phosphate, 0.12 g of sodium nitrate, 0.035 g of ascorbic acid, 0.37 g of tartaric acid,  
183 0.37 g of succinic acid and 0.05 sodium acetate. The pH of the media was adjusted to 6.75 with sodium  
184 hydroxide (NaOH) and then sterilized by autoclaving at 121°C. 10 mM ferric quinate (200x) Wolfe's  
185 Vitamin Solution (100x) (ATCC, Manassas, Virginia, USA) were added to the culture media shortly  
186 before use. The concentration of AMB-1 in solution was determined by optical density measurement  
187 (Spark, Tecan, Männedorf, Switzerland) and the approximate number of bacteria was extrapolated from  
188 a standard curve.

189

### 190 **CAS assay to assess siderophore quantification**

191

192 *Magnetospirillum magneticum* AMB-1 were cultured in 1.7 mL phenol red-free DMEM (11054020,  
193 Invitrogen, Carlsbad, California, USA) supplemented with GlutaMAX (35050061, Invitrogen, Carlsbad,  
194 California, USA) in a sealed 1.5 mL Eppendorf tube at 37°C for 24 h. FBS was excluded from the media  
195 and replaced with a known concentration of iron source; 25  $\mu\text{M}$  holo-transferrin (T0665, Sigma-Aldrich,  
196 St. Louis, Missouri, USA). Quantification of siderophores produced by AMB-1 was performed using the  
197 Chrome Azurol S (CAS) assay (199532, Sigma-Aldrich, St. Louis, Missouri, USA).<sup>34</sup> 100  $\mu\text{L}$  of each  
198 sample's supernatant was collected and mixed with 100  $\mu\text{L}$  CAS assay solution on a transparent 96-  
199 well plate. The assay was then incubated in the dark at room temperature for 1 h before the absorbance

200 was measured at 630 nm on a multimode microplate reader (Spark, Tecan, Männedorf, Switzerland).  
201 The measurement was expressed in siderophore production unit (s.p.u.), which was calculated as  
202 follows:

$$203 \quad \text{Siderophore production unit (s. p. u.)} = \frac{\text{OD}_{630,\text{ref}} - \text{OD}_{630}}{\text{OD}_{630,\text{ref}}}$$

204 DMEM supplemented with different concentrations of deferoxamine mesylate salt (DFO, D9533, Sigma-  
205 Aldrich, St. Louis, Missouri, USA) was prepared by serial dilution and used to generate a calibration  
206 curve (Supplementary 1).

207

### 208 **Analysis of human transferrin using SDS-PAGE Electrophoresis**

209

210 AMB-1 bacteria ( $1 \times 10^8$  cells/mL) were cultured in 1.7 mL phenol red-free DMEM (11054020,  
211 Invitrogen, Carlsbad, California, USA) in a sealed 1.5 mL Eppendorf tube at 30°C for 48 h. Excess  
212 volume was used to ensure no or minimal air was trapped in the tubes. 25  $\mu\text{M}$  holo-transferrin (holo-Tf,  
213 T4132, Sigma-Aldrich, St. Louis, Missouri, USA), or 25  $\mu\text{M}$  apo-transferrin (apo-Tf, T2036, Sigma-  
214 Aldrich, St. Louis, Missouri, USA) respectively were added to the mammalian cell culture media.  
215 Changes in transferrin molecular mass during the growth of AMB-1 were evaluated by sodium dodecyl  
216 sulfate-polyacrylamide gel electrophoresis (SDS-PAGE) analysis of culture supernatant.  
217 Electrophoresis was conducted using the protocol described by Laemmli<sup>35</sup> and protein loading of each  
218 sample was normalized to 2  $\mu\text{g}$ . Proteins were visualized using SYPRO ruby protein stain (1703126,  
219 Bio-rad, Hercules, California, USA). The electrophoresis chamber and the reagents were purchased  
220 from Bio-rad. Stained gels were imaged using a fluorescent scanner (Sapphire Biomolecular Imager,  
221 Azure Biosystems, Dublin, California, USA) at 488 nm excitation and 658 nm emission.

222

### 223 **Mammalian cell culture**

224

225 Human melanoma MDA-MB-435S cells (ATCC, Manassas, Virginia, USA) were cultured in high  
226 glucose Dulbecco's Modified Eagle's Medium (DMEM, Invitrogen, Carlsbad, California, USA)  
227 supplemented with 10% fetal bovine serum (FBS, Biowest, Nuaille, France) and 1% penicillin-  
228 streptomycin (CellGro, Corning, New York, USA). All cells were incubated at 37°C in a humidified  
229 atmosphere with 5%  $\text{CO}_2$  at 37°C.

230

### 231 **Co-culture of mammalian cancer cells with magnetotactic bacteria**

232

233 Human melanoma MDA-MB-435 cells ( $1 \times 10^5$  cells) were cultured on 12-well plates and incubated in  
234 a 5%  $\text{CO}_2$  incubator at 37°C for 24 h. For microscopic analysis at high magnification ( $> 40\times$ ), a circular  
235 cover slip was placed in each well prior to cell seeding. Following incubation, *Magnetospirillum*  
236 *magneticum* AMB-1 ( $1 \times 10^6 - 1 \times 10^8$  cells) were introduced into the wells. The well plate was stored  
237 in a sealable bag and the bag was flushed with nitrogen for 15 min in order to produce hypoxic  
238 conditions. The setup with the 12-well plate was then incubated at 37°C for 48 h. To serve as negative

239 and positive controls, 0, 10  $\mu$ M and 25  $\mu$ M of the iron-chelating agent deferoxamine mesylate (D9533,  
240 Sigma-Aldrich, St. Louis, Missouri, USA) was added to the MDA-MB-435S cell culture in place of AMB-  
241 1 bacteria.

242

### 243 **Immunofluorescence labelling of MDA-MB-435S cells**

244

245 After the co-culture, cells were washed with ice cold 1X Dulbecco's Phosphate-Buffered Saline solution  
246 (DPBS, Gibco, Carlsbad, California, USA) and then blocked with a 1% Bovine Serum Albumin (BSA,  
247 Sigma-Aldrich, St. Louis, Missouri, USA) solution diluted in 1X DPBS. The cells were then incubated  
248 with 10  $\mu$ g/mL primary anti-TfR1 antibody (ab84036, Abcam, Cambridge, UK) on ice in dark for one h.  
249 Subsequently, the cells were washed with ice-cold DPBS and incubated with 20  $\mu$ g/mL secondary goat  
250 anti-rabbit antibody (ab150077, Abcam, Cambridge, UK) and 25  $\mu$ g/mL Hoechst 33342 (H3570,  
251 Thermo Fisher Scientific, Waltham, Massachusetts, USA) on ice in dark for another hour. Next, the  
252 cells were washed with ice-cold 1X PBS twice and fixed with a 2% paraformaldehyde (PFA) solution.  
253 Fixed cells were washed three times with 1X DPBS and the cover slips were mounted on glass slides  
254 and stored overnight in dark at 4°C. A Nikon Eclipse Ti2 microscope equipped with a Yokogawa CSU-  
255 W1 Confocal Scanner Unit and Hamamatsu C13440-20CU ORCA Flash 4.0 V3 Digital CMOS camera  
256 were used for visualization. Microscope operation and image acquisition was performed using Nikon  
257 NIS-Elements Advanced Research 5.02 (Build 1266) software. ImageJ v2.0 (NIH) was used to process  
258 the obtained images.

259

### 260 **Evaluation of fluorescently labelled MDA-MB-435S cells by flow cytometry**

261

262 Flow cytometry was used to measure the expression of fluorescently labelled TfR1 on the surface of  
263 MDA-MB-435S cells. Cells were harvested at different timepoints during co-culture (0h, 6h, 12h, 24h)  
264 and washed in cold 1X DPBS (Gibco Carlsbad, California, USA). Harvested cells were stained with  
265 primary anti-TfR1 antibody (ab84036, Abcam, Cambridge, UK) at a concentration of 10  $\mu$ g/mL. After 1  
266 h of incubation on ice, cells were washed twice with 1X DPBS and then stained with 20  $\mu$ g/mL  
267 secondary goat anti-rabbit antibody (ab150077, Abcam, Cambridge, UK). Finally, cells were washed  
268 twice with 1X DPBS and analyzed by flow cytometry with BD LSRFortessa (BD Biosciences, San Jose,  
269 California, USA) using a 488nm excitation laser and 530/30 and 690/50 band pass emission filters for  
270 detection. FlowJo™ (Tree Star) software was used to evaluate the data.

271

272 Flow cytometry was used to assess the cell membrane integrity of MDA-MB-435S cells. Cells were  
273 harvested at different timepoints during co-culture (0h, 6h, 24h) and washed in cold 1X DPBS. Collected  
274 cells were stained with 1  $\mu$ g/mL Propidium Iodide (V13242, Thermo Fisher Scientific, Waltham,  
275 Massachusetts, USA) and incubated for 30 in a humidified atmosphere with 5% CO<sub>2</sub> at 37°C. Finally,  
276 cells were washed twice with 1X DPBS and analyzed by flow cytometry with BD LSRFortessa (BD  
277 Biosciences, San Jose, California, USA) using a 488nm excitation laser and 610/10 bandpass emission

278 filters for detection. FlowJo™ (Tree Star) software was used to evaluate data and graphs were plotted  
279 using Prism 8.0 (GraphPad).

280

## 281 **Statistics and data analysis**

282

283 All graphs and statistical analyses were generated using Prism 8.0 (GraphPad). Statistical significance  
284 and number of replicates of the experiments are described in each figure and figure legend. Error bars,  
285 where present, indicate the standard error of the mean (SD). P values are categorized as \*  $P < 0.05$ , \*\*  
286  $P < 0.01$ , and \*\*\*  $P < 0.001$ .

287

288

## 289 **Figure Legends**

290

291 **Figure 1:** Quantification of siderophores produced by *Magnetospirillum magneticum* AMB-1 and  
292 analysis of their interaction with human transferrin. **(A)** Siderophores produced by AMB-1 were  
293 quantified by a chrome azurol S (CAS) assay in DMEM and DMEM supplemented with 25  $\mu\text{M}$  holo-  
294 transferrin (n=4 per group, statistical significance was assessed with an unpaired two-tailed *t*-test). **(B)**  
295 Siderophore production units plotted in terms of the inferred equivalent concentration of deferoxamine  
296 (n=4 per group, statistical significance was assessed with an unpaired two-tailed *t*-test). **(C)** SDS-PAGE  
297 analysis displaying the effect of AMB-1 on the structure of human transferrin. Tested conditions are  
298 indicated in the figure, with holo-Tf corresponding to saturated transferrin and apo-Tf corresponding to  
299 non-saturated transferrin.

300

301 **Figure 2:** Analysis of TfR1 upregulation and cell surface expression on MDA-MB-435S. **(A)**  
302 Representative immunofluorescence images of human melanoma cells co-cultured under hypoxic  
303 conditions for 48 h with different ratios of AMB-1 bacteria and different concentrations of deferoxamine  
304 as a positive control. Images show MDA-MB-435S cells marked by anti-TfR1 antibody (green) and  
305 Hoechst 33342 (blue), (scale bar: 10  $\mu\text{M}$ ). **(B)** Quantification of the fold change in fluorescence intensity  
306 relative to the control condition, (n=2 per condition, statistical significance was assessed with an  
307 unpaired two-tailed *t*-test). **(C)** Membrane integrity was measured as a graphical representation of PI  
308 negative and PI positive cell populations after 0, 6 and 24 h. **(D)** TfR1 median fluorescence intensity  
309 measured over 24 hours, (n=3 per timepoint, statistical significance was assessed with an unpaired  
310 two-tailed *t*-test). **(E)** Representative lognormal fitted fluorescence intensity histograms of cell surface  
311 TfR1 expression on MDA-MB-435S cells in co-culture model and **(F)** negative control, (n=3 per  
312 timepoint).

313

314 **Supplementary Figure 1:** Calibration curve representing the siderophore production unit plotted  
315 against the concentration of deferoxamine (n= 3).

316



317 **Supplementary Figure 2:** Comparison of *in vitro* cancer cell culture under either hypoxic or normoxic  
318 conditions. Representative fluorescence and brightfield images of MDA-MB-435S cells stained with  
319 Image-IT Green Hypoxia Reagent (green), (scale bar: 25  $\mu$ M).

320

321

## 322 **Acknowledgements**

323

324 The authors thank Cameron Moshfegh for helpful discussions. Technical support was provided by the  
325 Flow Cytometry Core Facility at ETH Zurich for flow cytometry measurements. The authors appreciate  
326 the help of Nima Mirkhani with AMB-1 cultures. The authors thank Guy Riddihough (Life Science  
327 Editors) for his editing support and Michael G. Christiansen for critically reviewing the manuscript and  
328 for his support in creating the hypoxia device. SS gratefully acknowledges the support provided through  
329 the Branco Weiss Fellowship-Society in Science (title: "Cancer-fighting magnetic biobots: Harnessing  
330 the power of synthetic biology and magnetism").

331

332

## 333 **Competing interests**

334

335 The authors declare no conflict of interest.

336

337

## 338 **References**

339

- 340 1. Richardson, D. R.; Ponka, P., The molecular mechanisms of the metabolism and  
341 transport of iron in normal and neoplastic cells. *Biochimica et Biophysica Acta (BBA) -*  
342 *Reviews on Biomembranes* **1997**, *1331* (1), 1-40.
- 343 2. Lieu, P. T.; Heiskala, M.; Peterson, P. A.; Yang, Y., The roles of iron in health and  
344 disease. *Molecular Aspects of Medicine* **2001**, *22* (1), 1-87.
- 345 3. Wang, Y.; Yu, L.; Ding, J.; Chen, Y., Iron Metabolism in Cancer. *Int J Mol Sci* **2018**,  
346 *20* (1), 95.
- 347 4. Torti, S. V.; Torti, F. M., Iron and cancer: more ore to be mined. *Nature Reviews*  
348 *Cancer* **2013**, *13* (5), 342-355.
- 349 5. Lane, D. J. R.; Merlot, A. M.; Huang, M. L. H.; Bae, D. H.; Jansson, P. J.; Sahni,  
350 S.; Kalinowski, D. S.; Richardson, D. R., Cellular iron uptake, trafficking and metabolism:  
351 Key molecules and mechanisms and their roles in disease. *Biochimica et Biophysica Acta*  
352 *(BBA) - Molecular Cell Research* **2015**, *1853* (5), 1130-1144.
- 353 6. Steegmann-Olmedillas, J. L., The role of iron in tumour cell proliferation. *Clinical and*  
354 *Translational Oncology* **2011**, *13* (2), 71-76.
- 355 7. Holden, V. I.; Bachman, M. A., Diverging roles of bacterial siderophores during  
356 infection. *Metallomics* **2015**, *7* (6), 986-995.
- 357 8. Wilson, B. R.; Bogdan, A. R.; Miyazawa, M.; Hashimoto, K.; Tsuji, Y., Siderophores  
358 in Iron Metabolism: From Mechanism to Therapy Potential. *Trends in Molecular Medicine*  
359 **2016**, *22* (12), 1077-1090.
- 360 9. Brittenham, G. M.; Griffith, P. M.; Nienhuis, A. W.; McLaren, C. E.; Young, N. S.;  
361 Tucker, E. E.; Allen, C. J.; Farrell, D. E.; Harris, J. W., Efficacy of Deferoxamine in  
362 Preventing Complications of Iron Overload in Patients with Thalassemia Major. *New*  
363 *England Journal of Medicine* **1994**, *331* (9), 567-573.

- 364 10. Mobarra, N.; Shanaki, M.; Ehteram, H.; Nasiri, H.; Sahmani, M.; Saeidi, M.;  
365 Goudarzi, M.; Pourkarim, H.; Azad, M., A Review on Iron Chelators in Treatment of Iron  
366 Overload Syndromes. *Int J Hematol Oncol Stem Cell Res* **2016**, *10* (4), 239-247.
- 367 11. Hatcher, H. C.; Singh, R. N.; Torti, F. M.; Torti, S. V., Synthetic and natural iron  
368 chelators: therapeutic potential and clinical use. *Future Med Chem* **2009**, *1* (9), 1643-1670.
- 369 12. Bedford, M. R.; Ford, S. J.; Horniblow, R. D.; Iqbal, T. H.; Tselepis, C., Iron  
370 Chelation in the Treatment of Cancer: A New Role for Deferasirox? *The Journal of Clinical*  
371 *Pharmacology* **2013**, *53* (9), 885-891.
- 372 13. Ford, S. J.; Obeidy, P.; Lovejoy, D. B.; Bedford, M.; Nichols, L.; Chadwick, C.;  
373 Tucker, O.; Lui, G. Y. L.; Kalinowski, D. S.; Jansson, P. J.; Iqbal, T. H.; Alderson, D.;  
374 Richardson, D. R.; Tselepis, C., Deferasirox (ICL670A) effectively inhibits oesophageal  
375 cancer growth in vitro and in vivo. *Br J Pharmacol* **2013**, *168* (6), 1316-1328.
- 376 14. Lui, G. Y. L.; Obeidy, P.; Ford, S. J.; Tselepis, C.; Sharp, D. M.; Jansson, P. J.;  
377 Kalinowski, D. S.; Kovacevic, Z.; Lovejoy, D. B.; Richardson, D. R., The Iron Chelator,  
378 Deferasirox, as a Novel Strategy for Cancer Treatment: Oral Activity Against Human Lung  
379 Tumor Xenografts and Molecular Mechanism of Action. *Molecular Pharmacology* **2013**, *83*  
380 (1), 179.
- 381 15. Richardson, D. R., Iron chelators as therapeutic agents for the treatment of cancer.  
382 *Critical Reviews in Oncology/Hematology* **2002**, *42* (3), 267-281.
- 383 16. Yu, Y.; Gutierrez, E.; Kovacevic, Z.; Saletta, F.; Obeidy, P.; Rahmanto, Y. S.;  
384 Richardson, D. R., Iron Chelators for the Treatment of Cancer. *Current Medicinal Chemistry*  
385 **2012**, *19* (17), 2689-2702.
- 386 17. Saha, P.; Yeoh, B. S.; Xiao, X.; Golonka, R. M.; Kumarasamy, S.; Vijay-Kumar,  
387 M., Enterobactin, an iron chelating bacterial siderophore, arrests cancer cell proliferation.  
388 *Biochemical Pharmacology* **2019**, *168*, 71-81.
- 389 18. Mirabello, G.; Lenders, J. J. M.; Sommerdijk, N. A. J. M., Bioinspired synthesis of  
390 magnetite nanoparticles. *Chemical Society Reviews* **2016**, *45* (18), 5085-5106.
- 391 19. Faivre, D.; Schüler, D., Magnetotactic Bacteria and Magnetosomes. *Chemical*  
392 *Reviews* **2008**, *108* (11), 4875-4898.
- 393 20. Bazylinski, D.; Williams, T., *Ecophysiology of Magnetotactic Bacteria*. 1970; pp 37-  
394 75.
- 395 21. Yan, L.; Zhang, S.; Chen, P.; Liu, H.; Yin, H.; Li, H., Magnetotactic bacteria,  
396 magnetosomes and their application. *Microbiological Research* **2012**, *167* (9), 507-519.
- 397 22. González, L. M.; Ruder, W. C.; Mitchell, A. P.; Messner, W. C.; LeDuc, P. R.,  
398 Sudden motility reversal indicates sensing of magnetic field gradients in *Magnetospirillum*  
399 *magneticum* AMB-1 strain. *The ISME Journal* **2015**, *9* (6), 1399-1409.
- 400 23. Lefèvre, C. T.; Bennet, M.; Landau, L.; Vach, P.; Pignol, D.; Bazylinski, D. A.;  
401 Frankel, R. B.; Klumpp, S.; Faivre, D., Diversity of magneto-aerotactic behaviors and  
402 oxygen sensing mechanisms in cultured magnetotactic bacteria. *Biophys J* **2014**, *107* (2),  
403 527-538.
- 404 24. Felfoul, O.; Mohammadi, M.; Taherkhani, S.; de Lanauze, D.; Zhong Xu, Y.;  
405 Loghin, D.; Essa, S.; Jancik, S.; Houle, D.; Lafleur, M.; Gaboury, L.; Tabrizian, M.; Kaou,  
406 N.; Atkin, M.; Vuong, T.; Batist, G.; Beauchemin, N.; Radzioch, D.; Martel, S., Magneto-  
407 aerotactic bacteria deliver drug-containing nanoliposomes to tumour hypoxic regions. *Nature*  
408 *Nanotechnology* **2016**, *11*, 941.
- 409 25. Mengesha, A.; Dubois, L.; Lambin, P.; Landuyt, W.; Chiu, R. K.; Wouters, B. G.;  
410 Theys, J., Development of a flexible and potent hypoxia-inducible promoter for tumor-  
411 targeted gene expression in attenuated salmonella. *Cancer Biology & Therapy* **2006**, *5* (9),  
412 1120-1128.
- 413 26. Yu, B.; Yang, M.; Shi, L.; Yao, Y.; Jiang, Q.; Li, X.; Tang, L.-H.; Zheng, B.-J.;  
414 Yuen, K.-Y.; Smith, D. K.; Song, E.; Huang, J.-D., Explicit hypoxia targeting with tumor  
415 suppression by creating an "obligate" anaerobic *Salmonella Typhimurium* strain. *Scientific*  
416 *Reports* **2012**, *2* (1), 436.

- 417 27. Din, M. O.; Danino, T.; Prindle, A.; Skalak, M.; Selimkhanov, J.; Allen, K.; Julio,  
418 E.; Atolia, E.; Tsimring, L. S.; Bhatia, S. N.; Hasty, J., Synchronized cycles of bacterial  
419 lysis for in vivo delivery. *Nature* **2016**, 536, 81.
- 420 28. Chowdhury, S.; Castro, S.; Coker, C.; Hinchliffe, T. E.; Arpaia, N.; Danino, T.,  
421 Programmable bacteria induce durable tumor regression and systemic antitumor immunity.  
422 *Nature Medicine* **2019**, 25 (7), 1057-1063.
- 423 29. Forbes, N. S., Engineering the perfect (bacterial) cancer therapy. *Nature Reviews*  
424 *Cancer* **2010**, 10 (11), 785-794.
- 425 30. Duong, M. T.-Q.; Qin, Y.; You, S.-H.; Min, J.-J., Bacteria-cancer interactions:  
426 bacteria-based cancer therapy. *Experimental & Molecular Medicine* **2019**, 51 (12), 152.
- 427 31. Calugay, R. J.; Miyashita, H.; Okamura, Y.; Matsunaga, T., Siderophore production  
428 by the magnetic bacterium *Magnetospirillum magneticum* AMB-1. *FEMS Microbiology*  
429 *Letters* **2003**, 218 (2), 371-375.
- 430 32. Duchesne, P.; Grenier, D.; Mayrand, D., Binding and utilization of human transferrin  
431 by *Prevotella nigrescens*. *Infect Immun* **1999**, 67 (2), 576-580.
- 432 33. Bajbouj, K.; Shafarin, J.; Hamad, M., High-Dose Deferoxamine Treatment Disrupts  
433 Intracellular Iron Homeostasis, Reduces Growth, and Induces Apoptosis in Metastatic and  
434 Nonmetastatic Breast Cancer Cell Lines. *Technol Cancer Res Treat* **2018**, 17,  
435 1533033818764470-1533033818764470.
- 436 34. Schwyn, B.; Neilands, J. B., Universal chemical assay for the detection and  
437 determination of siderophores. *Analytical Biochemistry* **1987**, 160 (1), 47-56.
- 438 35. Laemmli, U. K., Cleavage of Structural Proteins during the Assembly of the Head of  
439 Bacteriophage T4. *Nature* **1970**, 227 (5259), 680-685.
- 440

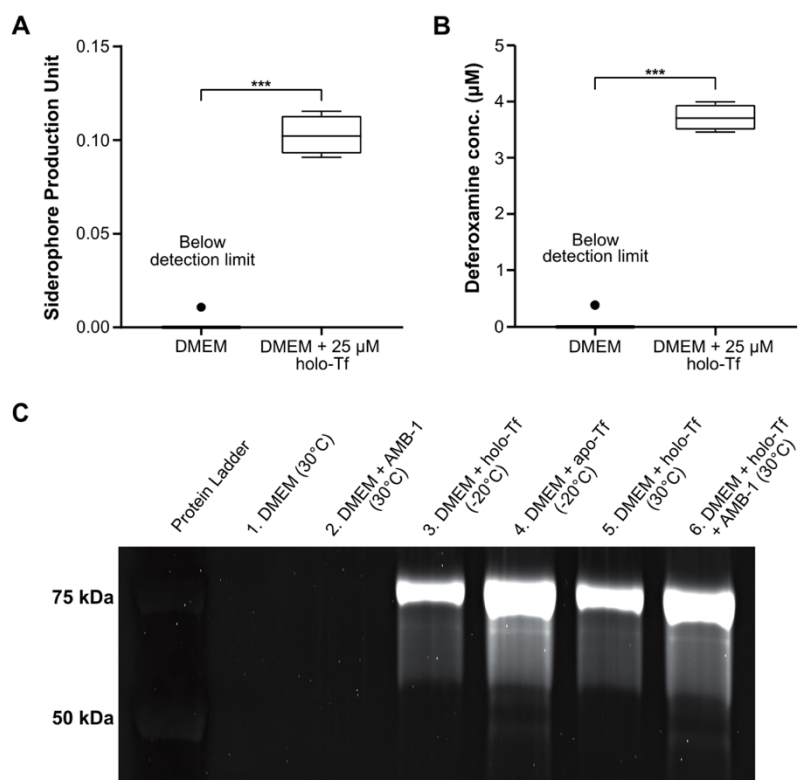

Figure 1

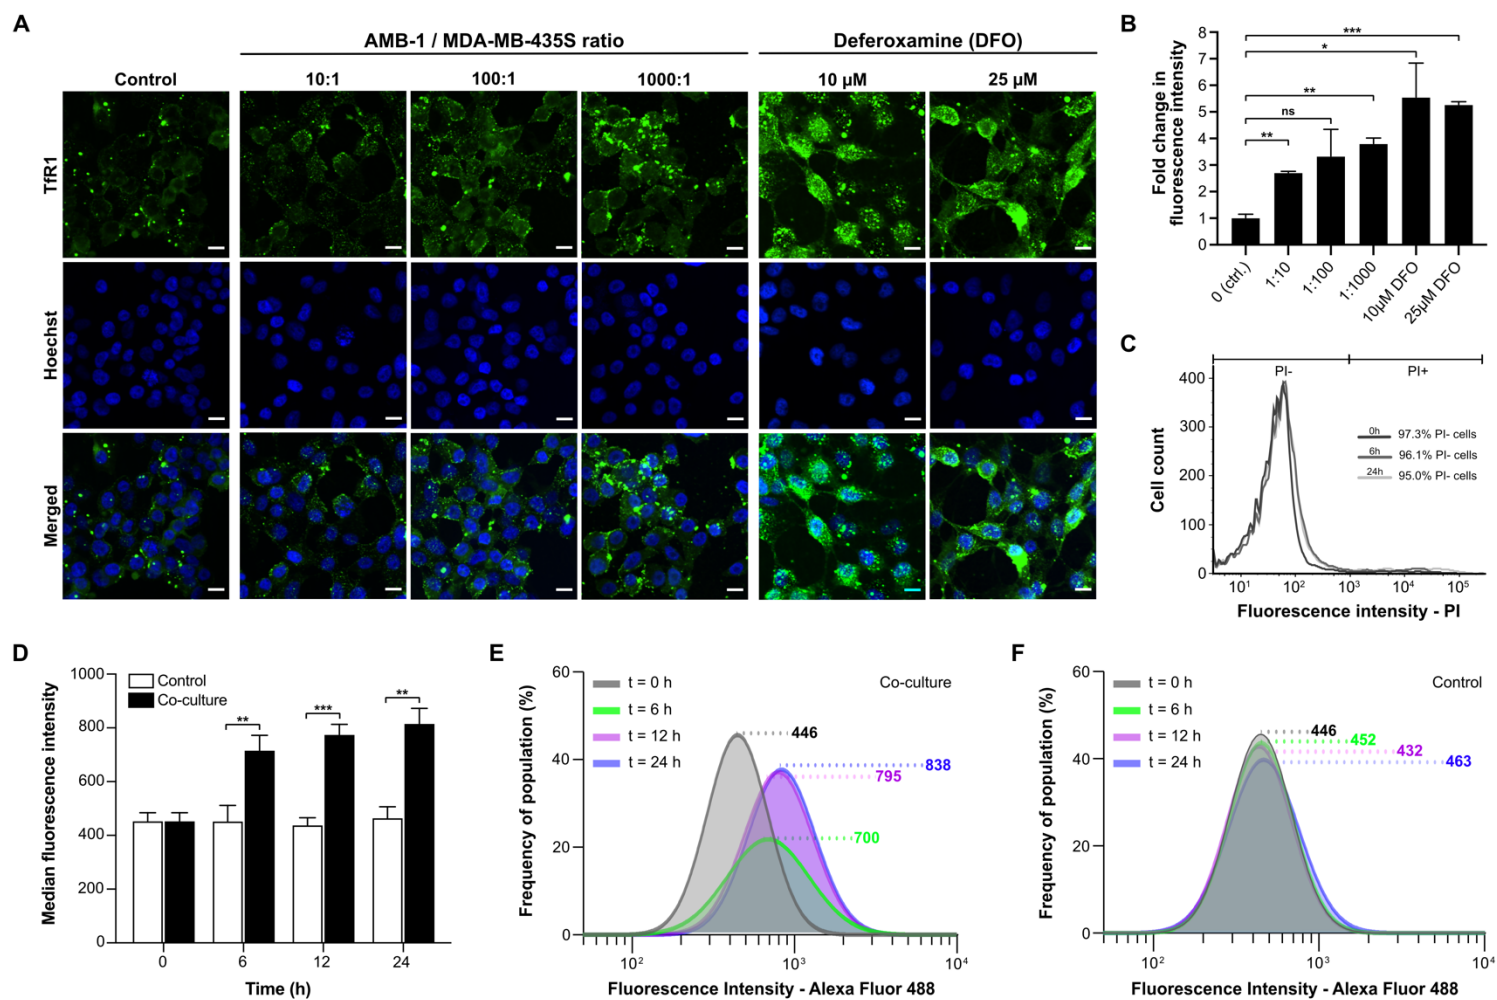

Figure 2

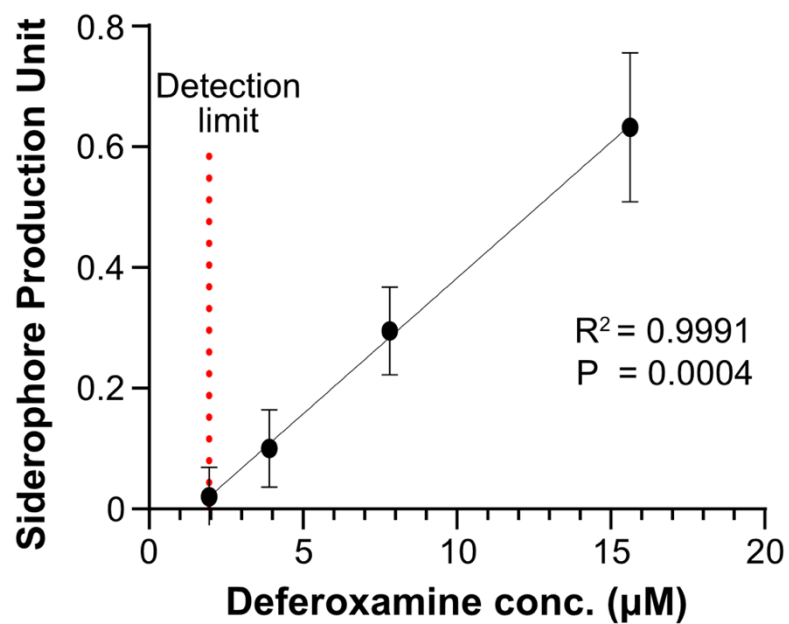

## MDA-MB-435S

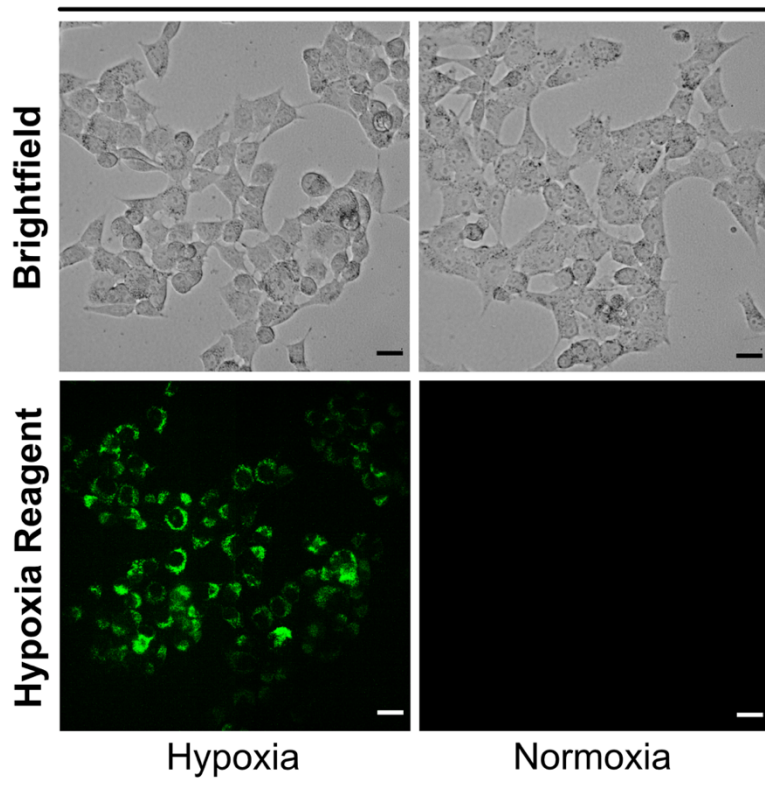

Source: http://biorxiv.org/content/10.1101/2020.05.28.121574v1.full.pdf
