# ***Magnetospirillum magneticum* as a living iron chelator induces transferrin receptor 1 upregulation in cancer cells**

Stefano Menghini<sup>†</sup>, Ping Shu Ho<sup>†</sup>, Tinotenda Gwisai, Simone Schuerle\*

Institute for Translational Medicine, Department of Health Sciences and Technology, ETH Zurich, CH-8092 Zurich, Switzerland.

<sup>†</sup> **These authors contributed equally**

**\*Correspondence:**

Corresponding Author

[simone.schuerle@hest.ethz.ch](mailto:simone.schuerle@hest.ethz.ch)

**Keywords: Magnetotactic bacteria, iron chelators, cancer therapy, transferrin receptor 1, siderophores**

## **Abstract**

Interest has grown in harnessing biological agents for cancer treatment as dynamic and responsive vectors with enhanced tumor targeting. While bacterial traits such as proliferation in tumors, modulation of an immune response, and local secretion of toxins have been well studied, less is known about bacteria as competitors for nutrients. Here, we investigated the use of a bacterial strain as a living iron chelator, competing for this nutrient vital to tumor growth and progression. We established an *in vitro* co-culture system consisting of the magnetotactic strain *Magnetospirillum magneticum* AMB-1 incubated under hypoxic conditions with human melanoma cells. Siderophores produced by  $10^8$  AMB-1/mL in human transferrin (Tf)-supplemented media were found to alter the Tf structure with an effect equivalent to  $3.78 \mu\text{M} \pm 0.117 \mu\text{M}$  deferoxamine, a potent drug used in iron chelation therapy. Our experiments revealed an increased expression of transferrin receptor 1 (TfR1), indicating the bacteria's ability to influence iron homeostasis in human melanoma cells. Our results show the potential of a bacterial strain as a self-replicating iron-chelating agent, which could serve as an additional mechanism reinforcing current bacterial cancer therapies.

## 52 1. Introduction

53

54 Due to limited selectivity in systemically delivered cancer therapeutics, interest has grown in  
55 harnessing bacteria as living, tumor-targeting anticancer agents. The therapeutic potential of  
56 facultative anaerobic bacteria has been supported by studies demonstrating the delivery of non-  
57 pathogenic strains of *Escherichia coli* to solid flank tumors with associated tumor regression.  
58 Additionally, safe administration of *Salmonella typhimurium* (VPN20009) has been shown for  
59 animal models and patients with metastatic melanoma (Chowdhury et al., 2019, Clairmont et  
60 al., 2000, Toso et al., 2002). Bacteria can act therapeutically by secreting innate or engineered  
61 toxins in situ (e.g. hemolysin E), transporting attached nanodrug formulations, or stimulating  
62 an immune response (Duong et al., 2019, Sedighi et al., 2019, Din et al., 2016, Harimoto et al.,  
63 2019). Colonizing bacteria can also engage in nutrient competition within the tumor  
64 microenvironment (Forbes, 2010, Sznol et al., 2000, Song et al., 2018). While the starvation of  
65 glucose as a crucial energy source to all cells has been studied intensively (Grasmann et al.,  
66 2019, Vander Heiden et al., 2009, Pavlova and Thompson, 2016), other nutrients that are in  
67 specifically high demand by cancer cells might serve as more specific, vulnerable targets for  
68 deprivation.

69

70 For example, iron metabolism is significantly altered in mammalian tumor cells and recognized  
71 as a metabolic hallmark of cancer (Wang et al., 2018, Torti and Torti, 2013). The main iron  
72 uptake mechanism adopted by most cells utilizes the internalization of transferrin receptor 1  
73 (TfR1) upon binding of iron-bound transferrin (Tf). TfR1 expression positively correlates with  
74 cellular iron starvation and is upregulated in cancer cells, since malignant cells generally  
75 require a nutrient surplus (Torti and Torti, 2013, Lane et al., 2015, Steegmann-Olmedillas,  
76 2011). Accordingly, several types of iron scavenging molecules have been utilized to compete  
77 with malignant cells for available iron sources and have demonstrated significant anti-  
78 neoplastic activity both, *in vitro* and *in vivo* (Bedford et al., 2013, Ford et al., 2013, Lui et al.,  
79 2013) Promising bacteria-derived iron-chelating siderophores, such as deferoxamine (DFO),  
80 as well as synthetic iron chelators have been developed for therapeutic purposes (Hatcher et  
81 al., 2009). However, non-negligible side effects, including systemic toxicity and low efficacy,  
82 have hampered their translation into clinical trials as therapeutic agents for cancer treatment  
83 (Richardson, 2002, Yu et al., 2012b, Saha et al., 2019).

84

85 Here we investigate the potential of a specific bacterial strain with high demand for iron to  
86 serve as local, self-replicating iron chelator that could thereby reduce systemic effects.  
87 Magnetotactic bacteria, like other bacteria, possess the ability to secrete iron-scavenging  
88 siderophores. Unlike other bacteria, their demand for iron is particularly high, since this  
89 mineral is crucial both for their survival and synthesis of unique intracellular organelles called  
90 magnetosomes. (Mirabello et al., 2016, Faivre and Schüler, 2008). These biomineralized  
91 magnetic nanocrystals are arranged in chains enclosed in a lipid bilayer and enable the bacteria  
92 to align with magnetic fields (Bazylinski and Williams, 1970, Yan et al., 2012, González et al.,  
93 2015). Furthermore, MTB are aerotactic, possessing an oxygen-sensing system that regulates  
94 motility in an oxygen gradient (Lefèvre et al., 2014). These features have previously been  
95 leveraged to magnetically guide MTB to the hypoxic core of solid tumors, yielding  
96 significantly higher tumor accumulation and penetration compared to their administration in  
97 the absence of external magnetic fields (Felfoul et al., 2016). Once on site, nutrients from the  
98 tumor microenvironment are sourced to maintain proliferation and growth, and we hypothesize  
99 that MTB could induce iron deprivation of cancer cells.

100

101 To study this, we employed *Magnetospirillum magneticum* strain AMB-1 and first quantified  
102 the production of siderophores, benchmarked with molar concentrations of DFO. We then  
103 investigated the influence of AMB-1 on cell surface TfR1 expression using human melanoma  
104 cells and demonstrated the ability of AMB-1 to affect iron homeostasis. The iron scavenging  
105 capabilities of bacterial strains with naturally high or enhanced siderophore production may  
106 act as an additional mechanism for bacterial cancer therapy, complementing or augmenting  
107 established bacterial anticancer mechanisms.

108

## 109 **2. Materials and Methods**

110

### 111 **2.1. Bacterial strain and culture condition**

112

113 *Magnetospirillum magneticum* AMB-1, a strain of magnetotactic bacteria, was purchased from  
114 ATCC (ATCC, Manassas, Virginia, USA). AMB-1 bacteria were grown anaerobically at 30°C,  
115 passaged weekly and cultured in liquid growth medium (ATCC medium: 1653 Revised  
116 Magnetic Spirillum Growth Medium). *Magnetospirillum magneticum* Growth Media (MSGM)  
117 contained the following per liter: 5.0 mL Wolfe's mineral solution (ATCC, Manassas, Virginia,  
118 USA), 0.45 mL Resazurin, 0.68 g of monopotassium phosphate, 0.12 g of sodium nitrate, 0.035  
119 g of ascorbic acid, 0.37 g of tartaric acid, 0.37 g of succinic acid and 0.05 sodium acetate. The  
120 pH of the media was adjusted to 6.75 with sodium hydroxide (NaOH) and then sterilized by  
121 autoclaving at 121°C. 10 mM ferric quinate (200x) Wolfe's Vitamin Solution (100x) (ATCC,  
122 Manassas, Virginia, USA) were added to the culture media shortly before use. The  
123 concentration of AMB-1 in solution was determined by optical density measurement (Spark,  
124 Tecan, Männedorf, Switzerland) and the approximate number of bacteria was extrapolated  
125 from a standard curve.

126

### 127 **2.2. CAS assay to assess siderophore quantification**

128

129 *Magnetospirillum magneticum* AMB-1 were cultured in 1.7 mL phenol red-free DMEM  
130 (11054020, Invitrogen, Carlsbad, California, USA) supplemented with GlutaMAX (35050061,  
131 Invitrogen, Carlsbad, California, USA) in a sealed 1.5 mL Eppendorf tube at 37°C for 24 h.  
132 FBS was excluded from the media and replaced with a known concentration of iron source; 25  
133 µM holo-transferrin (T0665, Sigma-Aldrich, St. Louis, Missouri, USA). Quantification of  
134 siderophores produced by AMB-1 was performed using the Chrome Azurol S (CAS) assay  
135 (199532, Sigma-Aldrich, St. Louis, Missouri, USA) (Schwyn and Neilands, 1987). 100 µL of  
136 each sample's supernatant was collected and mixed with 100 µL CAS assay solution on a  
137 transparent 96-well plate. The assay was then incubated in the dark at room temperature for 1  
138 h before the absorbance was measured at 630 nm on a multimode microplate reader (Spark,  
139 Tecan, Männedorf, Switzerland). The measurement was expressed in siderophore production  
140 unit (s.p.u.), which was calculated as follows:

$$141 \text{ Siderophore production unit (s. p. u.)} = \frac{OD_{630,ref} - OD_{630}}{OD_{630,ref}}$$

142 DMEM supplemented with different concentrations of deferoxamine mesylate salt (DFO,  
143 D9533, Sigma-Aldrich, St. Louis, Missouri, USA) was prepared by serial dilution and used to  
144 generate a calibration curve (Supplementary 1).

145

### 146 **2.3. Analysis of human transferrin using SDS-PAGE Electrophoresis**

147

148 AMB-1 bacteria ( $1 \times 10^8$  cells/mL) were cultured in 1.7 mL phenol red-free DMEM  
149 (11054020, Invitrogen, Carlsbad, California, USA) in a sealed 1.5 mL Eppendorf tube at 30°C

150 for 48 h. Excess volume was used to ensure no or minimal air was trapped in the tubes. 25  $\mu$ M  
151 holo-transferrin (holo-Tf, T4132, Sigma-Aldrich, St. Louis, Missouri, USA), or 25  $\mu$ M apo-  
152 transferrin (apo-Tf, T2036, Sigma-Aldrich, St. Louis, Missouri, USA) respectively were added  
153 to the mammalian cell culture media. Changes in transferrin molecular mass during the growth  
154 of AMB-1 were evaluated by sodium dodecyl sulfate-polyacrylamide gel electrophoresis  
155 (SDS-PAGE) analysis of culture supernatant. Electrophoresis was conducted using the  
156 protocol described by Laemmli (Laemmli, 1970) and protein loading of each sample was  
157 normalized to 2  $\mu$ g. Proteins were visualized using SYPRO ruby protein stain (1703126, Bio-  
158 rad, Hercules, California, USA). The electrophoresis chamber and the reagents were purchased  
159 from Bio-rad. Stained gels were imaged using a fluorescent scanner (Sapphire Biomolecular  
160 Imager, Azure Biosystems, Dublin, California, USA) at 488 nm excitation and 658 nm  
161 emission.

162

#### 163 **2.4. Mammalian cell culture**

164

165 Human melanoma MDA-MB-435S cells (ATCC, Manassas, Virginia, USA) were cultured in  
166 high glucose Dulbecco's Modified Eagle's Medium (DMEM, Invitrogen, Carlsbad, California,  
167 USA) supplemented with 10% fetal bovine serum (FBS, Biowest, Nuaille, France) and 1%  
168 penicillin-streptomycin (CellGro, Corning, New York, USA). All cells were incubated at 37°C  
169 in a humidified atmosphere with 5% CO<sub>2</sub> at 37°C.

170

#### 171 **2.5. Co-culture of mammalian cancer cells with magnetotactic bacteria**

172

173 Human melanoma MDA-MB-435 cells ( $1 \times 10^5$  cells) were cultured on 12-well plates and  
174 incubated in a 5% CO<sub>2</sub> incubator at 37°C for 24 h. For microscopic analysis at high  
175 magnification (> 40x), a circular cover slip was placed in each well prior to cell seeding.  
176 Following incubation, *Magnetospirillum magneticum* AMB-1 ( $1 \times 10^6 - 1 \times 10^8$  cells) were  
177 introduced into the wells. The well plate was stored in a sealable bag and the bag was flushed  
178 with nitrogen for 15 min in order to produce hypoxic conditions. The setup with the 12-well  
179 plate was then incubated at 37°C for 48 h. To serve as negative and positive controls, 0, 10  $\mu$ M  
180 and 25  $\mu$ M of the iron-chelating agent deferoxamine mesylate (D9533, Sigma-Aldrich, St.  
181 Louis, Missouri, USA) was added to the MDA-MB-435S cell culture in place of AMB-1  
182 bacteria.

183

#### 184 **2.6. Immunofluorescence labelling of MDA-MB-435S cells**

185

186 After the co-culture, cells were washed with ice cold 1X Dulbecco's Phosphate-Buffered  
187 Saline solution (DPBS, Gibco, Carlsbad, California, USA) and then blocked with a 1% Bovine  
188 Serum Albumin (BSA, Sigma-Aldrich, St. Louis, Missouri, USA) solution diluted in 1X  
189 DPBS. The cells were then incubated with 10  $\mu$ g/mL primary anti-TfR1 antibody (ab84036,  
190 Abcam, Cambridge, UK) on ice in dark for one h. Subsequently, the cells were washed with  
191 ice-cold DPBS and incubated with 20  $\mu$ g/mL secondary goat anti-rabbit antibody (ab150077,  
192 Abcam, Cambridge, UK) and 25  $\mu$ g/mL Hoechst 33342 (H3570, Thermo Fisher Scientific,  
193 Waltham, Massachusetts, USA) on ice in dark for another hour. Next, the cells were washed  
194 with ice-cold 1X PBS twice and fixed with a 2% paraformaldehyde (PFA) solution. Fixed cells  
195 were washed three times with 1X DPBS and the cover slips were mounted on glass slides and  
196 stored overnight in dark at 4°C. A Nikon Eclipse Ti2 microscope equipped with a Yokogawa  
197 CSU-W1 Confocal Scanner Unit and Hamamatsu C13440-20CU ORCA Flash 4.0 V3 Digital  
198 CMOS camera were used for visualization. Microscope operation and image acquisition was

199 performed using Nikon NIS-Elements Advanced Research 5.02 (Build 1266) software. ImageJ  
200 v2.0 (NIH) was used to process the obtained images.

201

## 202 **2.7. Evaluation of fluorescently labelled MDA-MB-435S cells by flow cytometry**

203 Flow cytometry was used to measure the expression of fluorescently labelled TfR1 on the  
204 surface of MDA-MB-435S cells. Cells were harvested at different timepoints during co-culture  
205 (0h, 6h, 12h, 24h) and washed in cold 1X DPBS (Gibco Carlsbad, California, USA). Harvested  
206 cells were stained with primary anti-TfR1 antibody (ab84036, Abcam, Cambridge, UK) at a  
207 concentration of 10  $\mu\text{g}/\text{mL}$ . After 1 h of incubation on ice, cells were washed twice with 1X  
208 DPBS and then stained with 20  $\mu\text{g}/\text{mL}$  secondary goat anti-rabbit antibody (ab150077, Abcam,  
209 Cambridge, UK). Finally, cells were washed twice with 1X DPBS and analyzed by flow  
210 cytometry with BD LSRFortessa (BD Biosciences, San Jose, California, USA) using a 488nm  
211 excitation laser and 530/30 and 690/50 band pass emission filters for detection. FlowJo<sup>TM</sup> (Tree  
212 Star) software was used to evaluate the data.

213 Flow cytometry was used to assess the cell membrane integrity of MDA-MB-435S cells. Cells  
214 were harvested at different timepoints during co-culture (0h, 6h, 24h) and washed in cold 1X  
215 DPBS. Collected cells were stained with 1  $\mu\text{g}/\text{mL}$  Propidium Iodide (V13242, Thermo Fisher  
216 Scientific, Waltham, Massachusetts, USA) and incubated for 30 in a humidified atmosphere  
217 with 5% CO<sub>2</sub> at 37°C. Finally, cells were washed twice with 1X DPBS and analyzed by flow  
218 cytometry with BD LSRFortessa (BD Biosciences, San Jose, California, USA) using a 488nm  
219 excitation laser and 610/10 bandpass emission filters for detection. FlowJo<sup>TM</sup> (Tree Star)  
220 software was used to evaluate data and graphs were plotted using Prism 8.0 (GraphPad).

221

## 222 **2.8. Statistics and data analysis**

223

224 All graphs and statistical analyses were generated using Prism 8.0 (GraphPad). Statistical  
225 significance and number of replicates of the experiments are described in each figure and figure  
226 legend. Error bars, where present, indicate the standard error of the mean (SD). P values are  
227 categorized as \* P<0.05, \*\* P<0.01, and \*\*\* P<0.001.

228

229

## 230 **3. Results**

231

### 232 **3.1. AMB-1 produced siderophores affect human transferrin structure in mammalian** 233 **cell culture medium**

234

235 First, we sought to determine to what extent AMB-1 would produce siderophores in Dulbecco's  
236 Modified Eagle's medium (DMEM). Using the Chrome Azurol S (CAS) assay (Supplementary  
237 Fig. 1), 10<sup>8</sup> AMB-1 bacteria were found to produce  $0.10 \pm 0.005$  siderophore units in DMEM  
238 supplemented with 25  $\mu\text{M}$  holo-transferrin (holo-Tf), while siderophore production in  
239 transferrin-free DMEM was negligible (Fig. 1A). AMB-1 siderophore production was  
240 compared to the widely used iron chelator deferoxamine. It was found that the siderophores  
241 produced by 10<sup>8</sup> AMB-1 in Tf-supplemented media was equivalent to  $3.78 \mu\text{M} \pm 0.117 \mu\text{M}$   
242 deferoxamine (Fig. 1B).

243

244 Having established the ability of AMB-1 to produce siderophores in Tf-supplemented media,  
245 we next determined whether AMB-1 would have an effect on human transferrin structure. SDS-  
246 PAGE analysis was used to compare DMEM supplemented with either iron-containing holo-  
247 Tf or iron-depleted apo-Tf. The apo-Tf appeared as a broader band on the SDS-gel compared  
248 to holo-Tf (Fig. 1C). Furthermore, we ascertained that holo-Tf structure was not affected by a



249 48 h incubation period at 30°C. To test whether the bacteria induced changes in Tf, AMB-1  
250 were inoculated in DMEM supplemented with holo-Tf. This approach revealed that holo-Tf  
251 formed a broader band very similar to that seen for the apo-Tf band incubated in DMEM (Fig.  
252 1C, lane 6). These experiments demonstrate that AMB-1 produced a quantifiable amount of  
253 siderophore when holo-Tf was supplemented to the mammalian cell culture media and that the  
254 structure of holo-Tf was altered by the bacteria.

255

### 256 **3.2. AMB-1 upregulates TfR1 expression in human melanoma cells**

257

258 To test whether AMB-1 can affect the iron uptake machinery in mammalian tumor cells we  
259 co-cultured AMB-1 with the human melanoma cell line MDA-MB-435S and monitored TfR1  
260 expression using immunofluorescence. The surface expression of TfR1 increased 2.7-fold on  
261 cancer cells co-cultured with live bacteria at AMB-1:MDA-MB-435S ratios as low as 10:1 (10<sup>6</sup>  
262 AMB-1). The TfR1 upregulation was shown to increase with increasing bacteria ratios (Fig.  
263 2A, B). Deferoxamine was used here to create iron-deficient cell culture conditions as a  
264 positive control. MDA-MB-435S cells showed a significant and increasing upregulation of  
265 TfR1 surface expression up to 5.6-fold. To ensure that the upregulation of TfR1 expression  
266 was on the cell surface and not cytoplasmic, cell membrane integrity in the cultures was  
267 monitored. Less than 5% of cells were stained by the cell-impermeant DNA stain propidium  
268 iodide (PI), indicating cell membrane preservation over time (Fig. 2C).

269

270 To gain insights on the TfR1 expression kinetics of the cell population, AMB-1-induced  
271 increase of cell surface TfR1 expression was analyzed over time. The effect, at an AMB-  
272 1:MDA-MB-435S ratio of 1000:1 was already apparent after 6 h of co-culture (Fig. 1D). The  
273 fluorescent intensity after 24 h of co-culture was 1.8 times higher than the initial value, while  
274 the change reached 95% of the final value after 12 h (Fig. 1E). Untreated cancer cells did not  
275 display any increase in fluorescence (Fig. 1F). Altogether, these findings show an upregulation  
276 of TfR1 on the cell surface of human melanoma cancer cells in the presence of AMB-1, thereby  
277 suggesting a direct link between AMB-1 induced disruption of iron uptake and TfR1  
278 expression.

279

280

## 281 **4. Discussion**

282

283 Magnetotactic bacteria acquire iron through siderophore-mediated uptake, as ferric and ferrous  
284 ions cannot directly enter bacteria cells. We quantified the number of siderophores produced  
285 by strain *Magnetospirillum magneticum* AMB-1 and investigated the bacteria's effect on  
286 human transferrin's structure in mammalian cell culture medium. The addition of AMB-1 to  
287 the media led to a broader holo-Tf band, similar to that of apo-Tf in DMEM, suggesting that  
288 the bacteria induced changes in Tf's molecular mass and structure (Fig. 1C, lane 6). Comparing  
289 our findings to studies involving the proteolytic cleavage of transferrin by *Prevotella*  
290 *nigrescens* we can deduce that specific cleavage of the protein did not occur, as sub-products  
291 with lower molecular mass were not detected on the gel (Duchesne et al., 1999). Therefore, our  
292 results suggest a loss of iron ions by holo-Tf, which is consistent with bacteria-produced  
293 siderophores having a higher affinity for Fe ions compared to human transferrin (Wilson et al.,  
294 2016, Holden and Bachman, 2015). This higher affinity could be exploited by AMB-1 to  
295 efficiently compete for ferric ions with the host cells, resulting in iron starvation for the latter.

296

297 We then showed that AMB-1 inoculation with human melanoma cell cultures affects iron  
298 homeostasis of the cancer cells. Iron starvation is mainly characterized by alterations in the

299 iron import machinery, specifically by an upregulation of the transferrin receptor 1 on the cell  
300 surface. Increased TfR1 expression found on MDA-MB-435S melanoma cancer cells  
301 correlates with increasing bacteria ratios. This finding suggests that AMB-1 effectively  
302 competes for free iron ions and therefore limits the mineral's availability to MDA-MB-435S  
303 cells (Fig. 2A, B). Moreover, a significant increase of TfR1 expression could already be  
304 detected 6 h after inoculation (Fig. 2D-F). Similarly, the cancer cells showed a significant  
305 upregulation of TfR1 surface expression after incubation with deferoxamine (10  $\mu$ M and 25  
306  $\mu$ M), in line with previous reports on cellular iron deficiency (Torti and Torti, 2013, Lane et  
307 al., 2015, Bajbouj et al., 2018). These observations demonstrated that AMB-1 affect the iron  
308 import mechanisms of human melanoma cells, acting as an effective competitor for iron when  
309 in co-culture with MDA-MB-435S cells.

310  
311 Our data support the idea that AMB-1 have the ability to act as living iron chelators by secreting  
312 a quantifiable amount of siderophores. We showed that  $10^8$  AMB-1/mL can produce high-  
313 affinity iron scavenging molecules equivalent to 3.78  $\mu$ M deferoxamine over 24 h (Fig. 1B).  
314 Previous studies demonstrated that the treatment of different cell lines with 10  $\mu$ M - 30  $\mu$ M  
315 deferoxamine significantly reduced cell viability *in vitro* (Ford et al., 2013, Bajbouj et al.,  
316 2018). Moreover, a significant diminution of cell viability was even detected at the lower  
317 deferoxamine concentration of 2.5  $\mu$ M when combined with the chemotherapeutic drug  
318 cisplatin (Ford et al., 2013). Nonetheless, the implementation of molecular iron scavenging  
319 molecules in translational medicine is hampered by elevated systemic toxicity, as well as  
320 limited tumor selectivity. These challenges might be overcome by implementing bacteria as  
321 direct competitors for nutrients at the tumor site. The ability of AMB-1 to self-replicate and  
322 secrete comparable, sustained doses of siderophores qualifies them as promising candidates for  
323 further studies.

324  
325 The intrinsic magneto-aerotactic capability of MTB allows them to regulate their motility  
326 towards environments with low oxygen concentration as well as react to externally applied  
327 magnetic fields (Lefèvre et al., 2014, González et al., 2015). Aerotaxis and hypoxic traits have  
328 also been leveraged in *Salmonella* strains, enabling them to act as bacterial anti-cancer agents  
329 that target necrotic tumor microenvironments with poor oxygen supply (Mengesha et al., 2006,  
330 Yu et al., 2012a, Kasinskas and Forbes, 2007). In addition to enhanced tumor accumulation,  
331 native bacterial cytotoxicity, expression of anticancer agents, and immunomodulation have  
332 been exploited for their use in clinical cancer therapy (Din et al., 2016, Chowdhury et al., 2019,  
333 Forbes, 2010, Duong et al., 2019). By combining iron chelation with these additional benefits  
334 of bacterial cancer therapy, we envision that MTB could become a valid therapeutic agent to  
335 implement against cancer.

336  
337 Our work motivates the use of living AMB-1 as self-replicating iron scavenging organisms  
338 actively competing for this vital nutrient, with the possibility of compromising the survival of  
339 cancer cells. Further application could include the use of tumor-targeting organisms both as a  
340 monotherapy and as a combination therapy with established anti-neoplastic drugs to obtain  
341 optimal clinical outcomes. Moreover, the unique characteristics of magnetotactic bacteria  
342 could be exploited to engineer iron-scavenging strains of surrogate commensal and attenuated  
343 bacteria that have already been established as anti-cancer agents. This work lays the foundation  
344 for future investigations which combine iron chelation with bacterial cancer therapy to enhance  
345 existing therapeutic strategies and open new frontiers for combating cancer.

346  
347

## 348 **5. Author contributions**

349  
350 SS and PSH conceived and designed the experiments. PSH and SM collected and analyzed  
351 data. SM wrote the manuscript. TG assisted the authors and contributed to the paper revisions.  
352 SS supervised the study and helped writing the paper.

353  
354

## 355 **6. Acknowledgements**

356  
357 The authors thank Cameron Moshfegh for helpful discussions. Technical support was provided  
358 by the Flow Cytometry Core Facility at ETH Zurich for flow cytometry measurements. The  
359 authors appreciate the help of Nima Mirkhani with AMB-1 cultures. The authors thank Guy  
360 Riddihough (Life Science Editors) for his editing support and Michael G. Christiansen for  
361 critically reviewing the manuscript and for his assistance in creating the hypoxia device.

362  
363

## 364 **7. Funding**

365  
366 This research was supported by the Branco Weiss Fellowship-Society in Science (title:  
367 “Cancer-fighting magnetic biobots: Harnessing the power of synthetic biology and  
368 magnetism”).

369  
370

## 371 **8. Conflict of interest**

372  
373 The authors declare no conflict of interest.

374  
375

## 376 **References**

- 377  
378 BAJBOUJ, K., SHAFARIN, J. & HAMAD, M. 2018. High-Dose Deferoxamine Treatment  
379 Disrupts Intracellular Iron Homeostasis, Reduces Growth, and Induces Apoptosis in  
380 Metastatic and Nonmetastatic Breast Cancer Cell Lines. *Technology in cancer  
381 research & treatment*, 17, 1533033818764470-1533033818764470.  
382 BAZYLINSKI, D. & WILLIAMS, T. 1970. Ecophysiology of Magnetotactic Bacteria.  
383 BEDFORD, M. R., FORD, S. J., HORNIBLOW, R. D., IQBAL, T. H. & TSELEPIS, C. 2013.  
384 Iron Chelation in the Treatment of Cancer: A New Role for Deferasirox? *The Journal  
385 of Clinical Pharmacology*, 53, 885-891.  
386 CHOWDHURY, S., CASTRO, S., COKER, C., HINCHLIFFE, T. E., ARPAIA, N. & DANINO,  
387 T. 2019. Programmable bacteria induce durable tumor regression and systemic  
388 antitumor immunity. *Nature Medicine*, 25, 1057-1063.  
389 CLAIRMONT, C., LEE, K. C., PIKE, J., ITTENSOHN, M., LOW, K. B., PAWELEK, J.,  
390 BERMUDEZ, D., BRECHER, S. M., MARGITICH, D., TURNIER, J., LI, Z., LUO, X.,  
391 KING, I. & ZHENG, L. M. 2000. Biodistribution and Genetic Stability of the Novel  
392 Antitumor Agent VNP20009, a Genetically Modified Strain of Salmonella  
393 typhimurium. *The Journal of Infectious Diseases*, 181, 1996-2002.  
394 DIN, M. O., DANINO, T., PRINDLE, A., SKALAK, M., SELIMKHANOV, J., ALLEN, K.,  
395 JULIO, E., ATOLIA, E., TSIMRING, L. S., BHATIA, S. N. & HASTY, J. 2016.  
396 Synchronized cycles of bacterial lysis for in vivo delivery. *Nature*, 536, 81.  
397 DUCHESNE, P., GRENIER, D. & MAYRAND, D. 1999. Binding and utilization of human  
398 transferrin by *Prevotella nigrescens*. *Infection and immunity*, 67, 576-580.  
399 DUONG, M. T.-Q., QIN, Y., YOU, S.-H. & MIN, J.-J. 2019. Bacteria-cancer interactions:  
400 bacteria-based cancer therapy. *Experimental & Molecular Medicine*, 51, 152.



- 401 FAIVRE, D. & SCHÜLER, D. 2008. Magnetotactic Bacteria and Magnetosomes. *Chemical*  
402 *Reviews*, 108, 4875-4898.
- 403 FELFOUL, O., MOHAMMADI, M., TAHERKHANI, S., DE LANAUZE, D., ZHONG XU, Y.,  
404 LOGHIN, D., ESSA, S., JANCIK, S., HOULE, D., LAFLEUR, M., GABOURY, L.,  
405 TABRIZIAN, M., KAOU, N., ATKIN, M., VUONG, T., BATIST, G., BEAUCHEMIN, N.,  
406 RADZIOCH, D. & MARTEL, S. 2016. Magneto-aerotactic bacteria deliver drug-  
407 containing nanoliposomes to tumour hypoxic regions. *Nature Nanotechnology*, 11,  
408 941.
- 409 FORBES, N. S. 2010. Engineering the perfect (bacterial) cancer therapy. *Nature Reviews*  
410 *Cancer*, 10, 785-794.
- 411 FORD, S. J., OBEIDY, P., LOVEJOY, D. B., BEDFORD, M., NICHOLS, L., CHADWICK, C.,  
412 TUCKER, O., LUI, G. Y. L., KALINOWSKI, D. S., JANSSON, P. J., IQBAL, T. H.,  
413 ALDERSON, D., RICHARDSON, D. R. & TSELEPIS, C. 2013. Deferasirox  
414 (ICL670A) effectively inhibits oesophageal cancer growth in vitro and in vivo. *British*  
415 *journal of pharmacology*, 168, 1316-1328.
- 416 GONZÁLEZ, L. M., RUDER, W. C., MITCHELL, A. P., MESSNER, W. C. & LEDUC, P. R.  
417 2015. Sudden motility reversal indicates sensing of magnetic field gradients in  
418 *Magnetospirillum magneticum* AMB-1 strain. *The ISME Journal*, 9, 1399-1409.
- 419 GRASMANN, G., SMOLLE, E., OLSCHIEWSKI, H. & LEITHNER, K. 2019. Gluconeogenesis  
420 in cancer cells - Repurposing of a starvation-induced metabolic pathway? *Biochimica*  
421 *et biophysica acta. Reviews on cancer*, 1872, 24-36.
- 422 HARIMOTO, T., SINGER, Z. S., VELAZQUEZ, O. S., ZHANG, J., CASTRO, S.,  
423 HINCHLIFFE, T. E., MATHER, W. & DANINO, T. 2019. Rapid screening of  
424 engineered microbial therapies in a 3D multicellular model. *Proceedings of the*  
425 *National Academy of Sciences of the United States of America*, 116, 9002-9007.
- 426 HATCHER, H. C., SINGH, R. N., TORTI, F. M. & TORTI, S. V. 2009. Synthetic and natural  
427 iron chelators: therapeutic potential and clinical use. *Future medicinal chemistry*, 1,  
428 1643-1670.
- 429 HOLDEN, V. I. & BACHMAN, M. A. 2015. Diverging roles of bacterial siderophores during  
430 infection. *Metallomics*, 7, 986-995.
- 431 KASINSKAS, R. W. & FORBES, N. S. 2007. Salmonella typhimurium Lacking Ribose  
432 Chemoreceptors Localize in Tumor Quiescence and Induce Apoptosis. *Cancer*  
433 *Research*, 67, 3201.
- 434 LAEMMLI, U. K. 1970. Cleavage of Structural Proteins during the Assembly of the Head of  
435 Bacteriophage T4. *Nature*, 227, 680-685.
- 436 LANE, D. J. R., MERLOT, A. M., HUANG, M. L. H., BAE, D. H., JANSSON, P. J., SAHNI, S.,  
437 KALINOWSKI, D. S. & RICHARDSON, D. R. 2015. Cellular iron uptake, trafficking  
438 and metabolism: Key molecules and mechanisms and their roles in disease.  
439 *Biochimica et Biophysica Acta (BBA) - Molecular Cell Research*, 1853, 1130-1144.
- 440 LEFÈVRE, C. T., BENNET, M., LANDAU, L., VACH, P., PIGNOL, D., BAZYLINSKI, D. A.,  
441 FRANKEL, R. B., KLUMPP, S. & FAIVRE, D. 2014. Diversity of magneto-aerotactic  
442 behaviors and oxygen sensing mechanisms in cultured magnetotactic bacteria.  
443 *Biophysical journal*, 107, 527-538.
- 444 LUI, G. Y. L., OBEIDY, P., FORD, S. J., TSELEPIS, C., SHARP, D. M., JANSSON, P. J.,  
445 KALINOWSKI, D. S., KOVACEVIC, Z., LOVEJOY, D. B. & RICHARDSON, D. R.  
446 2013. The Iron Chelator, Deferasirox, as a Novel Strategy for Cancer Treatment:  
447 Oral Activity Against Human Lung Tumor Xenografts and Molecular Mechanism of  
448 Action. *Molecular Pharmacology*, 83, 179.
- 449 MENGESHA, A., DUBOIS, L., LAMBIN, P., LANDUYT, W., CHIU, R. K., WOUTERS, B. G.  
450 & THEYS, J. 2006. Development of a flexible and potent hypoxia-inducible promoter  
451 for tumor-targeted gene expression in attenuated salmonella. *Cancer Biology &*  
452 *Therapy*, 5, 1120-1128.
- 453 MIRABELLO, G., LENDERS, J. J. M. & SOMMERDIJK, N. A. J. M. 2016. Bioinspired  
454 synthesis of magnetite nanoparticles. *Chemical Society Reviews*, 45, 5085-5106.

- 455 PAVLOVA, NATALYA N. & THOMPSON, CRAIG B. 2016. The Emerging Hallmarks of  
456 Cancer Metabolism. *Cell Metabolism*, 23, 27-47.
- 457 RICHARDSON, D. R. 2002. Iron chelators as therapeutic agents for the treatment of cancer.  
458 *Critical Reviews in Oncology/Hematology*, 42, 267-281.
- 459 SAHA, P., YEOH, B. S., XIAO, X., GOLONKA, R. M., KUMARASAMY, S. & VIJAY-KUMAR,  
460 M. 2019. Enterobactin, an iron chelating bacterial siderophore, arrests cancer cell  
461 proliferation. *Biochemical Pharmacology*, 168, 71-81.
- 462 SCHWYN, B. & NEILANDS, J. B. 1987. Universal chemical assay for the detection and  
463 determination of siderophores. *Analytical Biochemistry*, 160, 47-56.
- 464 SEDIGHI, M., ZAHEDI BIALVAEI, A., HAMBLIN, M. R., OHADI, E., ASADI, A.,  
465 HALAJZADEH, M., LOHRASBI, V., MOHAMMADZADEH, N., AMIRIANI, T.,  
466 KRUTOVA, M., AMINI, A. & KOUHSARI, E. 2019. Therapeutic bacteria to combat  
467 cancer; current advances, challenges, and opportunities. *Cancer medicine*, 8, 3167-  
468 3181.
- 469 SONG, S., VUAI, M. S. & ZHONG, M. 2018. The role of bacteria in cancer therapy -  
470 enemies in the past, but allies at present. *Infectious agents and cancer*, 13, 9-9.
- 471 STEEGMANN-OLMEDILLAS, J. L. 2011. The role of iron in tumour cell proliferation. *Clinical  
472 and Translational Oncology*, 13, 71-76.
- 473 SZNOL, M., LIN, S. L., BERMUDEZ, D., ZHENG, L. M. & KING, I. 2000. Use of  
474 preferentially replicating bacteria for the treatment of cancer. *The Journal of clinical  
475 investigation*, 105, 1027-1030.
- 476 TORTI, S. V. & TORTI, F. M. 2013. Iron and cancer: more ore to be mined. *Nature Reviews  
477 Cancer*, 13, 342-355.
- 478 TOSO, J. F., GILL, V. J., HWU, P., MARINCOLA, F. M., RESTIFO, N. P.,  
479 SCHWARTZENTRUBER, D. J., SHERRY, R. M., TOPALIAN, S. L., YANG, J. C.,  
480 STOCK, F., FREEZER, L. J., MORTON, K. E., SEIPP, C., HAWORTH, L.,  
481 MAVROUKAKIS, S., WHITE, D., MACDONALD, S., MAO, J., SZNOL, M. &  
482 ROSENBERG, S. A. 2002. Phase I study of the intravenous administration of  
483 attenuated *Salmonella typhimurium* to patients with metastatic melanoma. *Journal of  
484 clinical oncology : official journal of the American Society of Clinical Oncology*, 20,  
485 142-152.
- 486 VANDER HEIDEN, M. G., CANTLEY, L. C. & THOMPSON, C. B. 2009. Understanding the  
487 Warburg Effect: The Metabolic Requirements of Cell Proliferation. *Science*, 324,  
488 1029.
- 489 WANG, Y., YU, L., DING, J. & CHEN, Y. 2018. Iron Metabolism in Cancer. *International  
490 journal of molecular sciences*, 20, 95.
- 491 WILSON, B. R., BOGDAN, A. R., MIYAZAWA, M., HASHIMOTO, K. & TSUJI, Y. 2016.  
492 Siderophores in Iron Metabolism: From Mechanism to Therapy Potential. *Trends in  
493 Molecular Medicine*, 22, 1077-1090.
- 494 YAN, L., ZHANG, S., CHEN, P., LIU, H., YIN, H. & LI, H. 2012. Magnetotactic bacteria,  
495 magnetosomes and their application. *Microbiological Research*, 167, 507-519.
- 496 YU, B., YANG, M., SHI, L., YAO, Y., JIANG, Q., LI, X., TANG, L.-H., ZHENG, B.-J., YUEN,  
497 K.-Y., SMITH, D. K., SONG, E. & HUANG, J.-D. 2012a. Explicit hypoxia targeting  
498 with tumor suppression by creating an "obligate" anaerobic *Salmonella Typhimurium*  
499 strain. *Scientific Reports*, 2, 436.
- 500 YU, Y., GUTIERREZ, E., KOVACEVIC, Z., SALETTA, F., OBEIDY, P., RAHMANTO, Y. S. &  
501 RICHARDSON, D. R. 2012b. Iron Chelators for the Treatment of Cancer. *Current  
502 Medicinal Chemistry*, 19, 2689-2702.
- 503

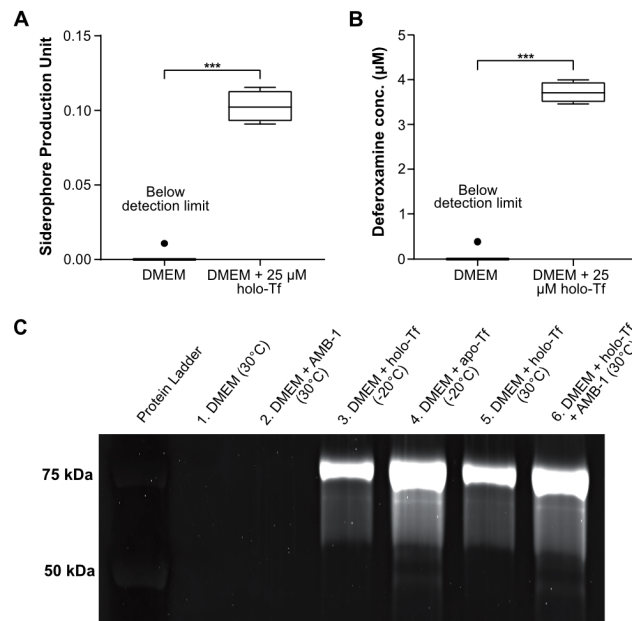

504 **Figure 1:** Quantification of siderophores produced by *Magnetospirillum magneticum* AMB-1  
505 and analysis of their interaction with human transferrin. **(A)** Siderophores produced by AMB-  
506 1 were quantified by a chrome azurol S (CAS) assay in DMEM and DMEM supplemented with  
507 25 μM holo-transferrin (n=4 per group, statistical significance was assessed with an unpaired  
508 two-tailed *t*-test). **(B)** Siderophore production units plotted in terms of the inferred equivalent  
509 concentration of deferoxamine (n=4 per group, statistical significance was assessed with an  
510 unpaired two-tailed *t*-test). **(C)** SDS-PAGE analysis displaying the effect of AMB-1 on the  
511 structure of human transferrin. Tested conditions are indicated in the figure, with holo-Tf  
512 corresponding to saturated transferrin and apo-Tf corresponding to non-saturated transferrin.

513  
514  
515  
516  
517  
518  
519  
520  
521  
522  
523  
524  
525  
526  
527  
528  
529  
530  
531  
532  
533  
534  
535

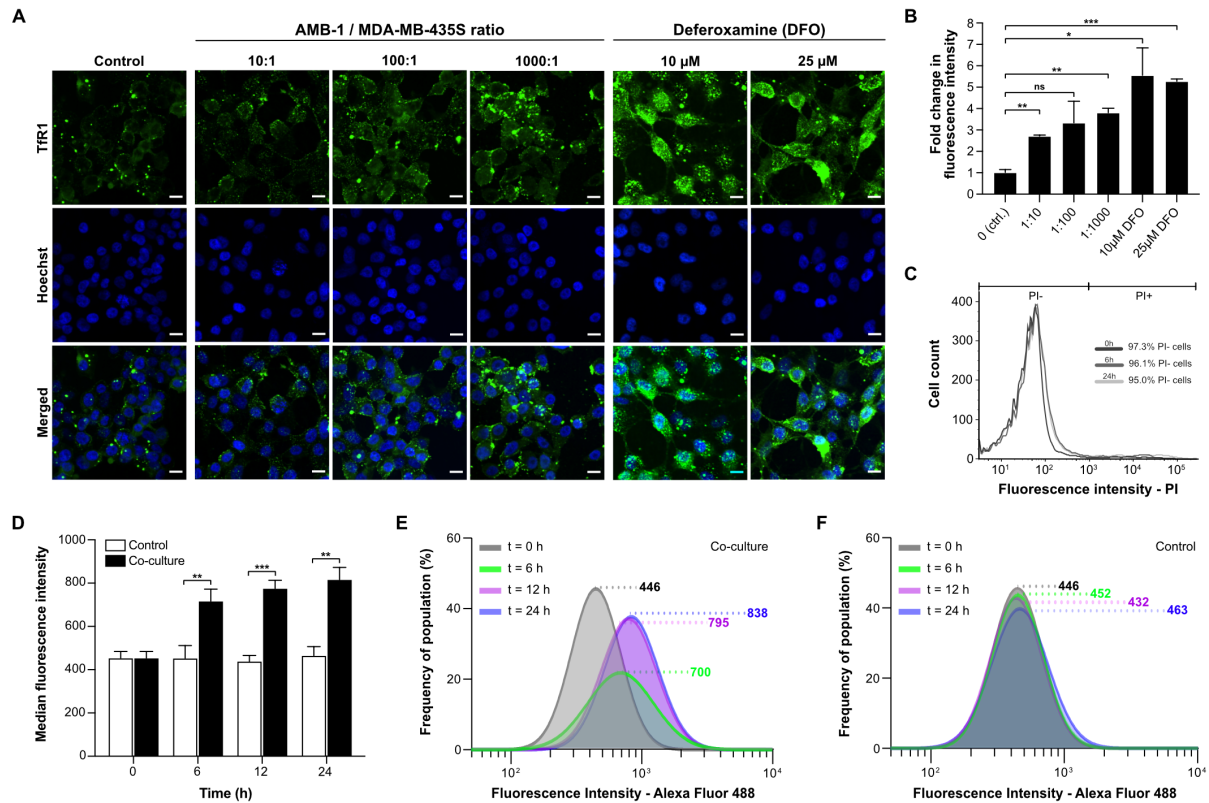

536 **Figure 2:** Analysis of TfR1 upregulation and cell surface expression on MDA-MB-435S. (A)  
 537 Representative immunofluorescence images of human melanoma cells co-cultured under  
 538 hypoxic conditions for 48 h with different ratios of AMB-1 bacteria and different  
 539 concentrations of deferoxamine as a positive control. Images show MDA-MB-435S cells  
 540 marked by anti-TfR1 antibody (green) and Hoechst 33342 (blue), (scale bar: 10  $\mu$ M). (B)  
 541 Quantification of the fold change in fluorescence intensity relative to the control condition,  
 542 (n=2 per condition, statistical significance was assessed with an unpaired two-tailed *t*-test). (C)  
 543 Membrane integrity was measured as a graphical representation of PI negative and PI positive  
 544 cell populations after 0, 6 and 24 h. (D) TfR1 median fluorescence intensity measured over 24  
 545 hours, (n=3 per timepoint, statistical significance was assessed with an unpaired two-tailed *t*-  
 546 test). (E) Representative log-normal fitted fluorescence intensity histograms of cell surface  
 547 TfR1 expression on MDA-MB-435S cells in co-culture model and (F) negative control, (n=3  
 548 per timepoint).
